# Supplementary material for: Associations of variants In the hexokinase 1 and interleukin 18 receptor regions with oxyhemoglobin saturation during sleep
Source: PubMed Central journal article supplement (PMC6467367; doi:10.1371/journal.pgen.1007739), 2019-04-16

Figure S14 Avg SpO2 EA Males 5p15 rs852576

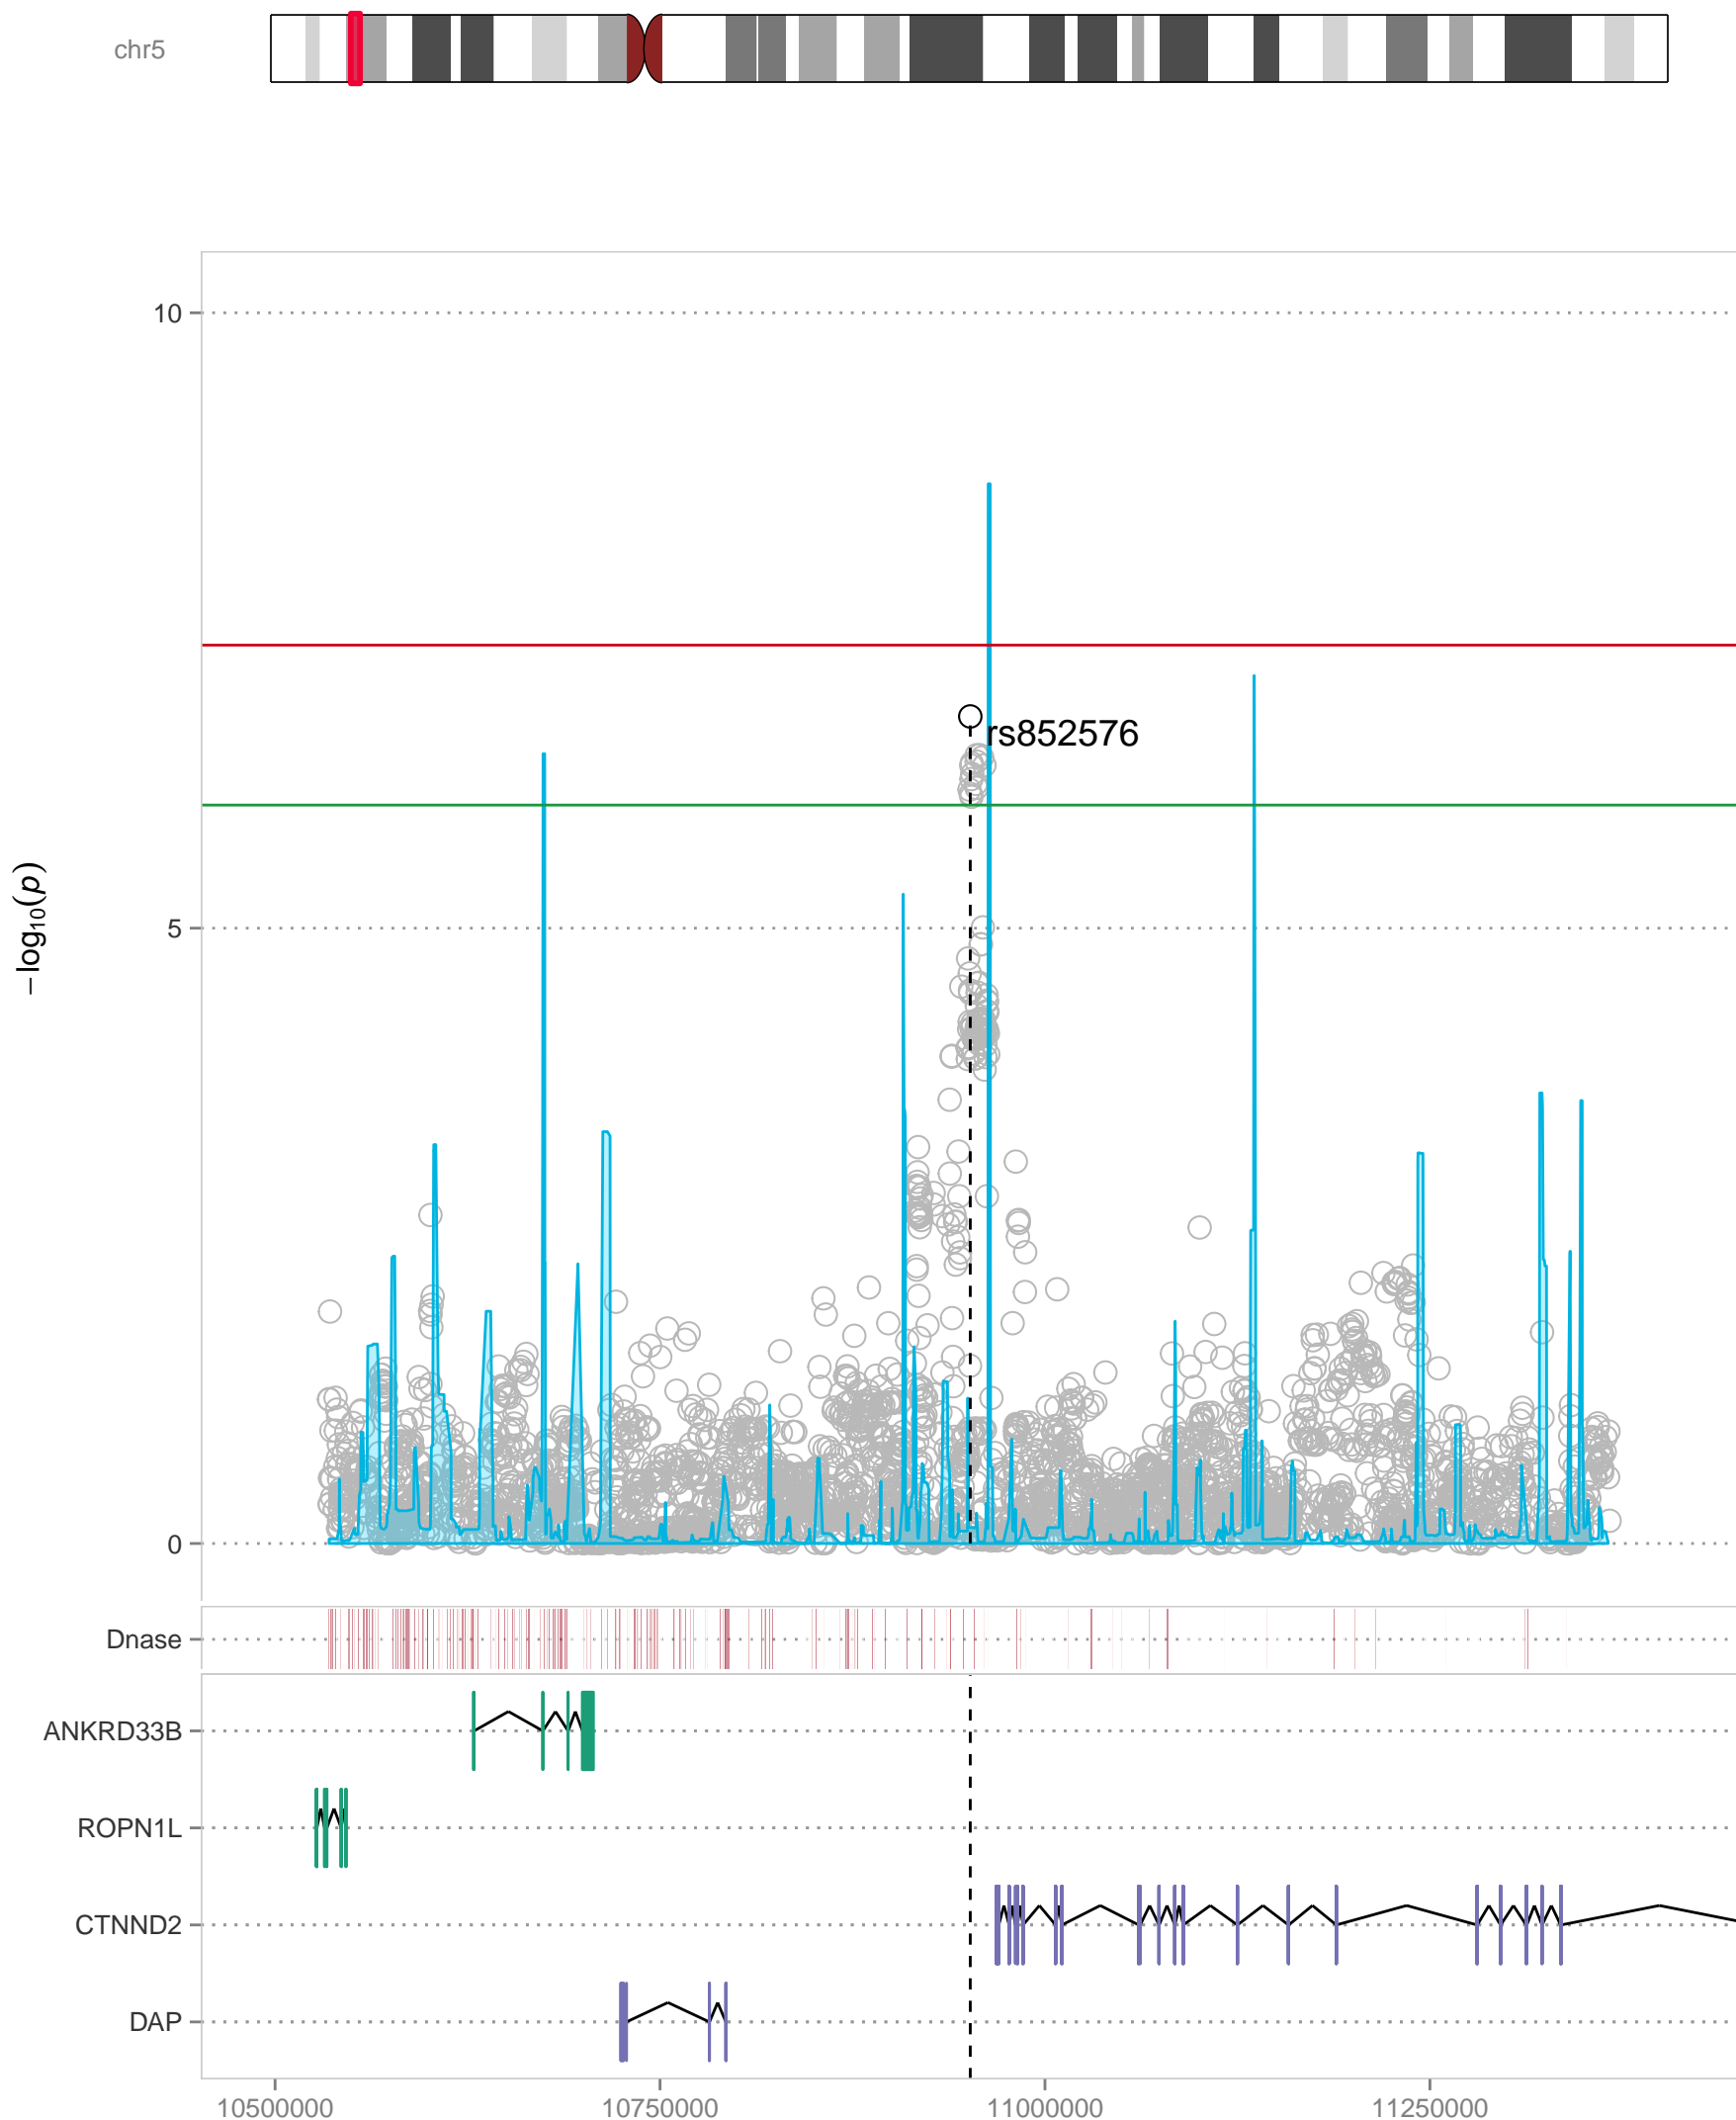

Supplement: pgen.1007739.s014.pdf [file pgen.1007739.s014.pdf]
