# Supplementary material for: Associations of variants In the hexokinase 1 and interleukin 18 receptor regions with oxyhemoglobin saturation during sleep
Source: PubMed Central journal article supplement (PMC6467367; doi:10.1371/journal.pgen.1007739), 2019-04-16

Figure S15 Avg SpO2 EA Males 5q21 rs17594657

chr5

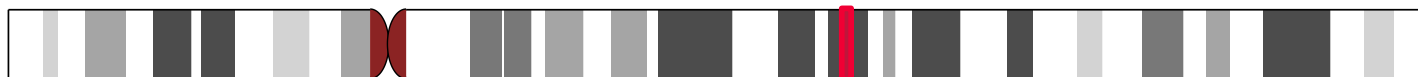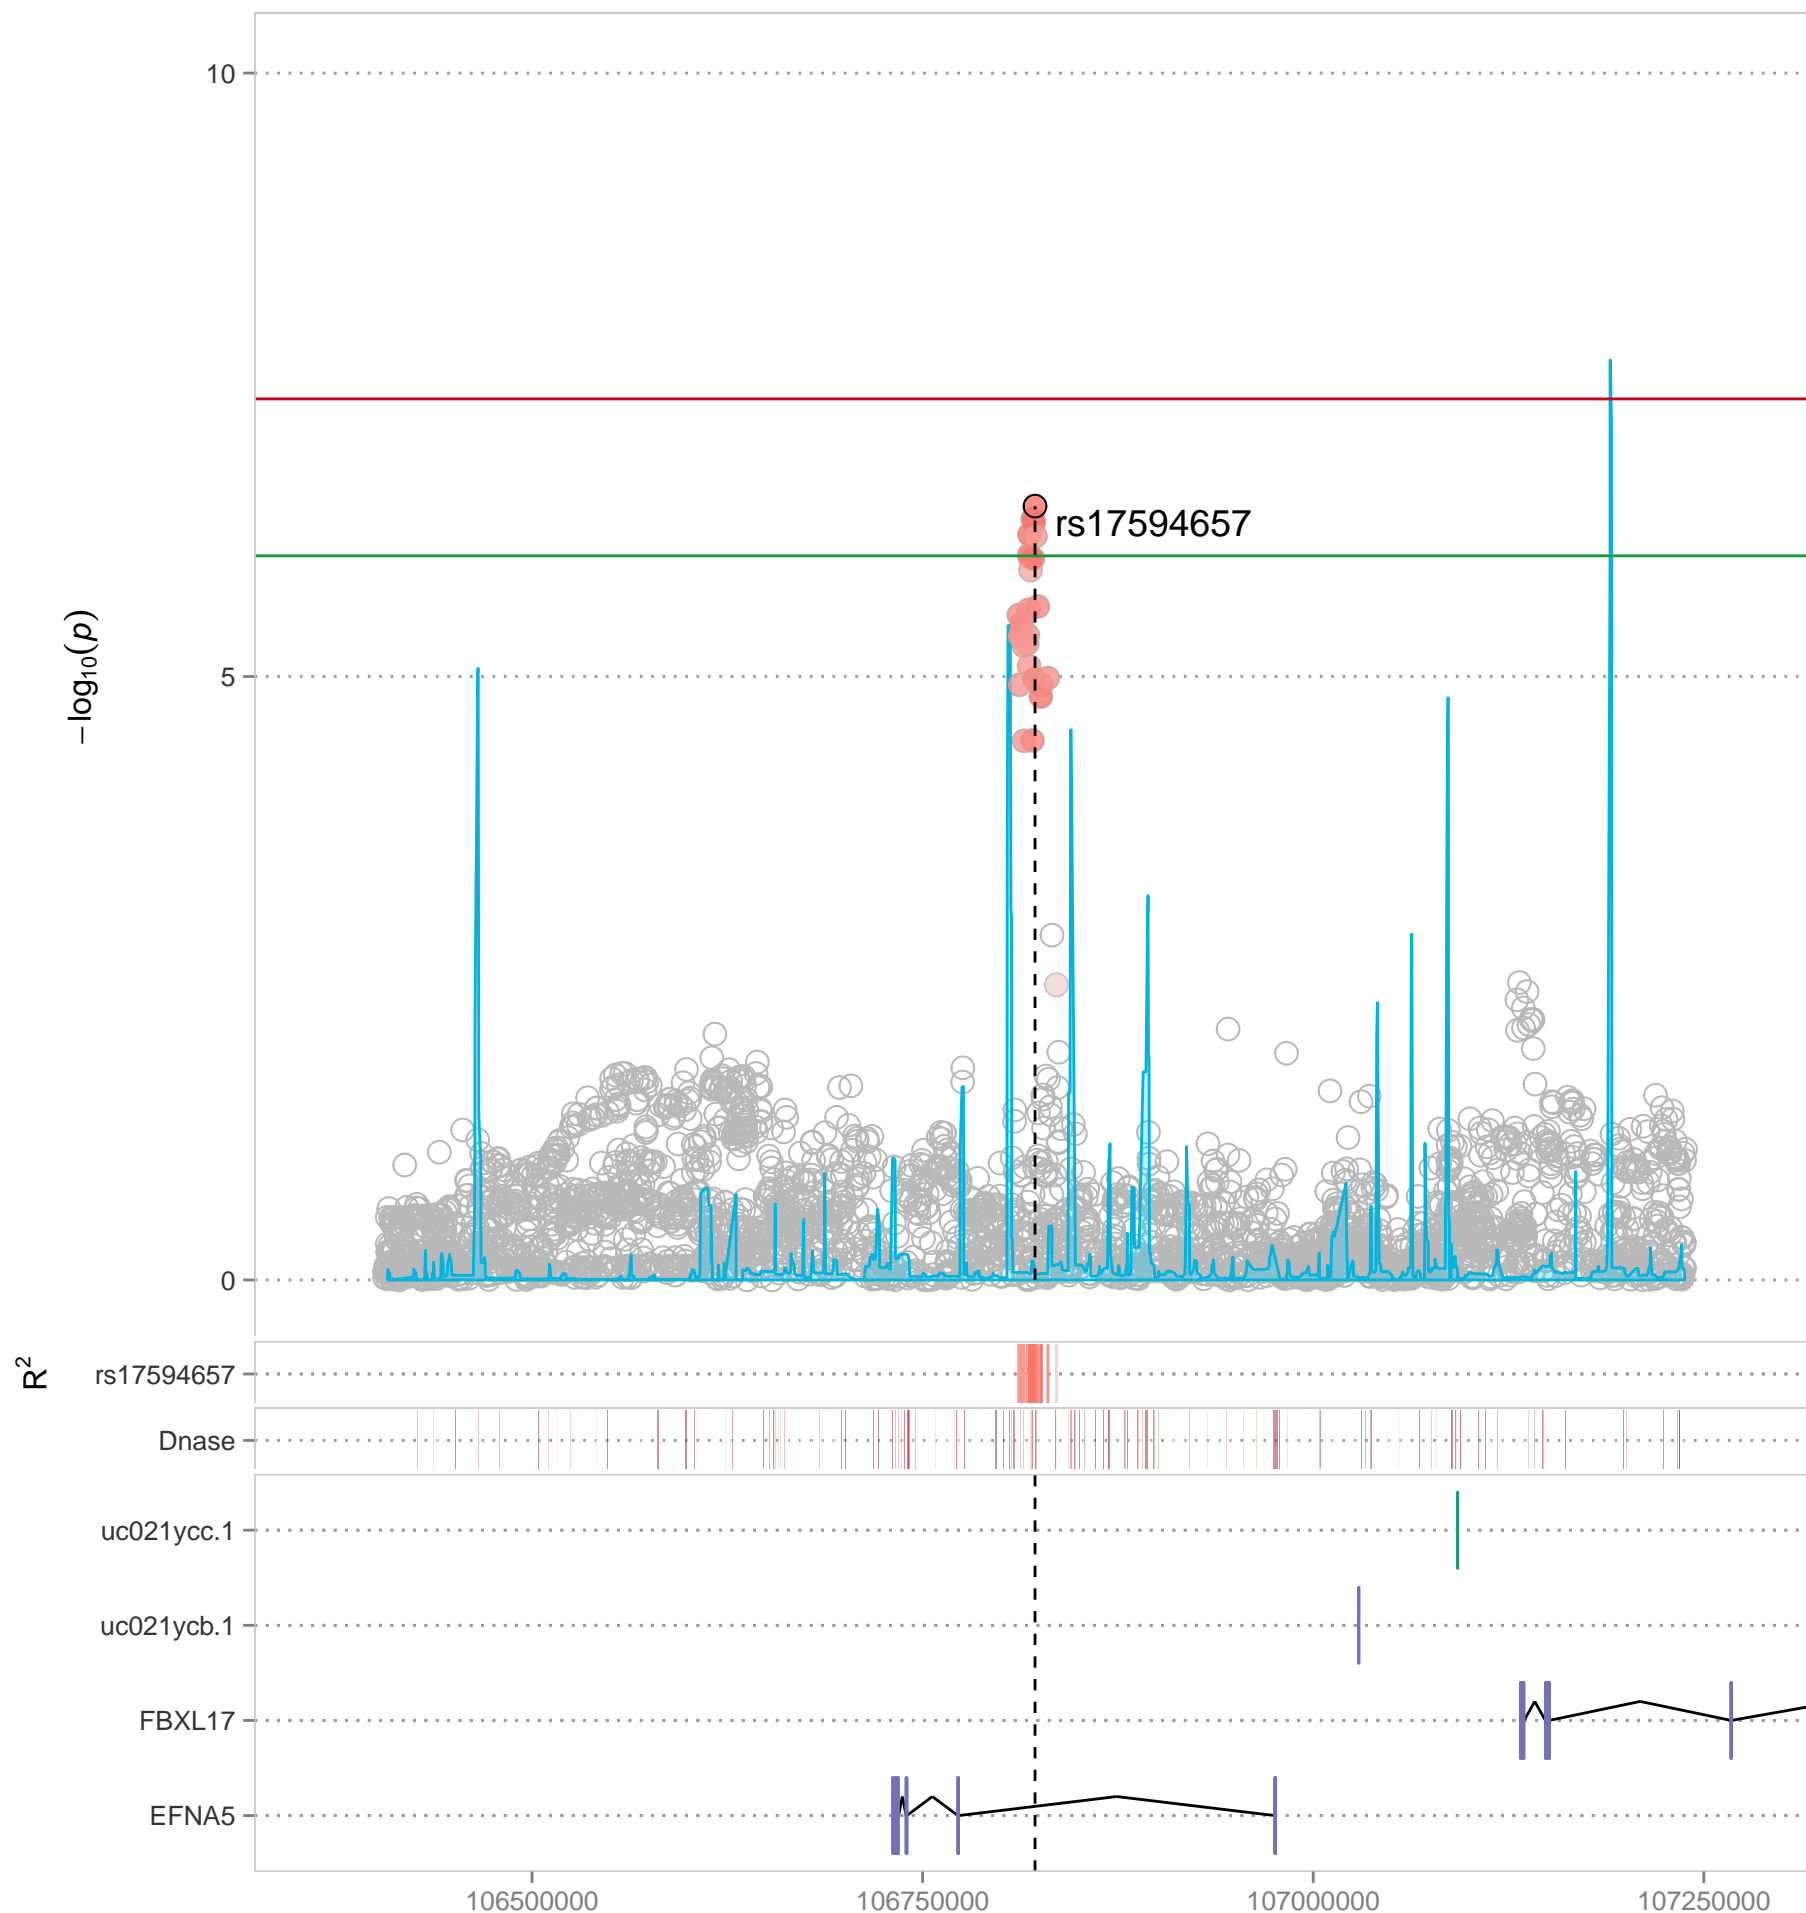

Supplement: pgen.1007739.s015.pdf [file pgen.1007739.s015.pdf]
