# Supplementary material for: Associations of variants In the hexokinase 1 and interleukin 18 receptor regions with oxyhemoglobin saturation during sleep
Source: PubMed Central journal article supplement (PMC6467367; doi:10.1371/journal.pgen.1007739), 2019-04-16

Figure S18 Avg SpO2 AA 22q11 rs74822035

chr22

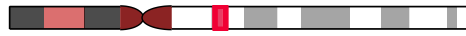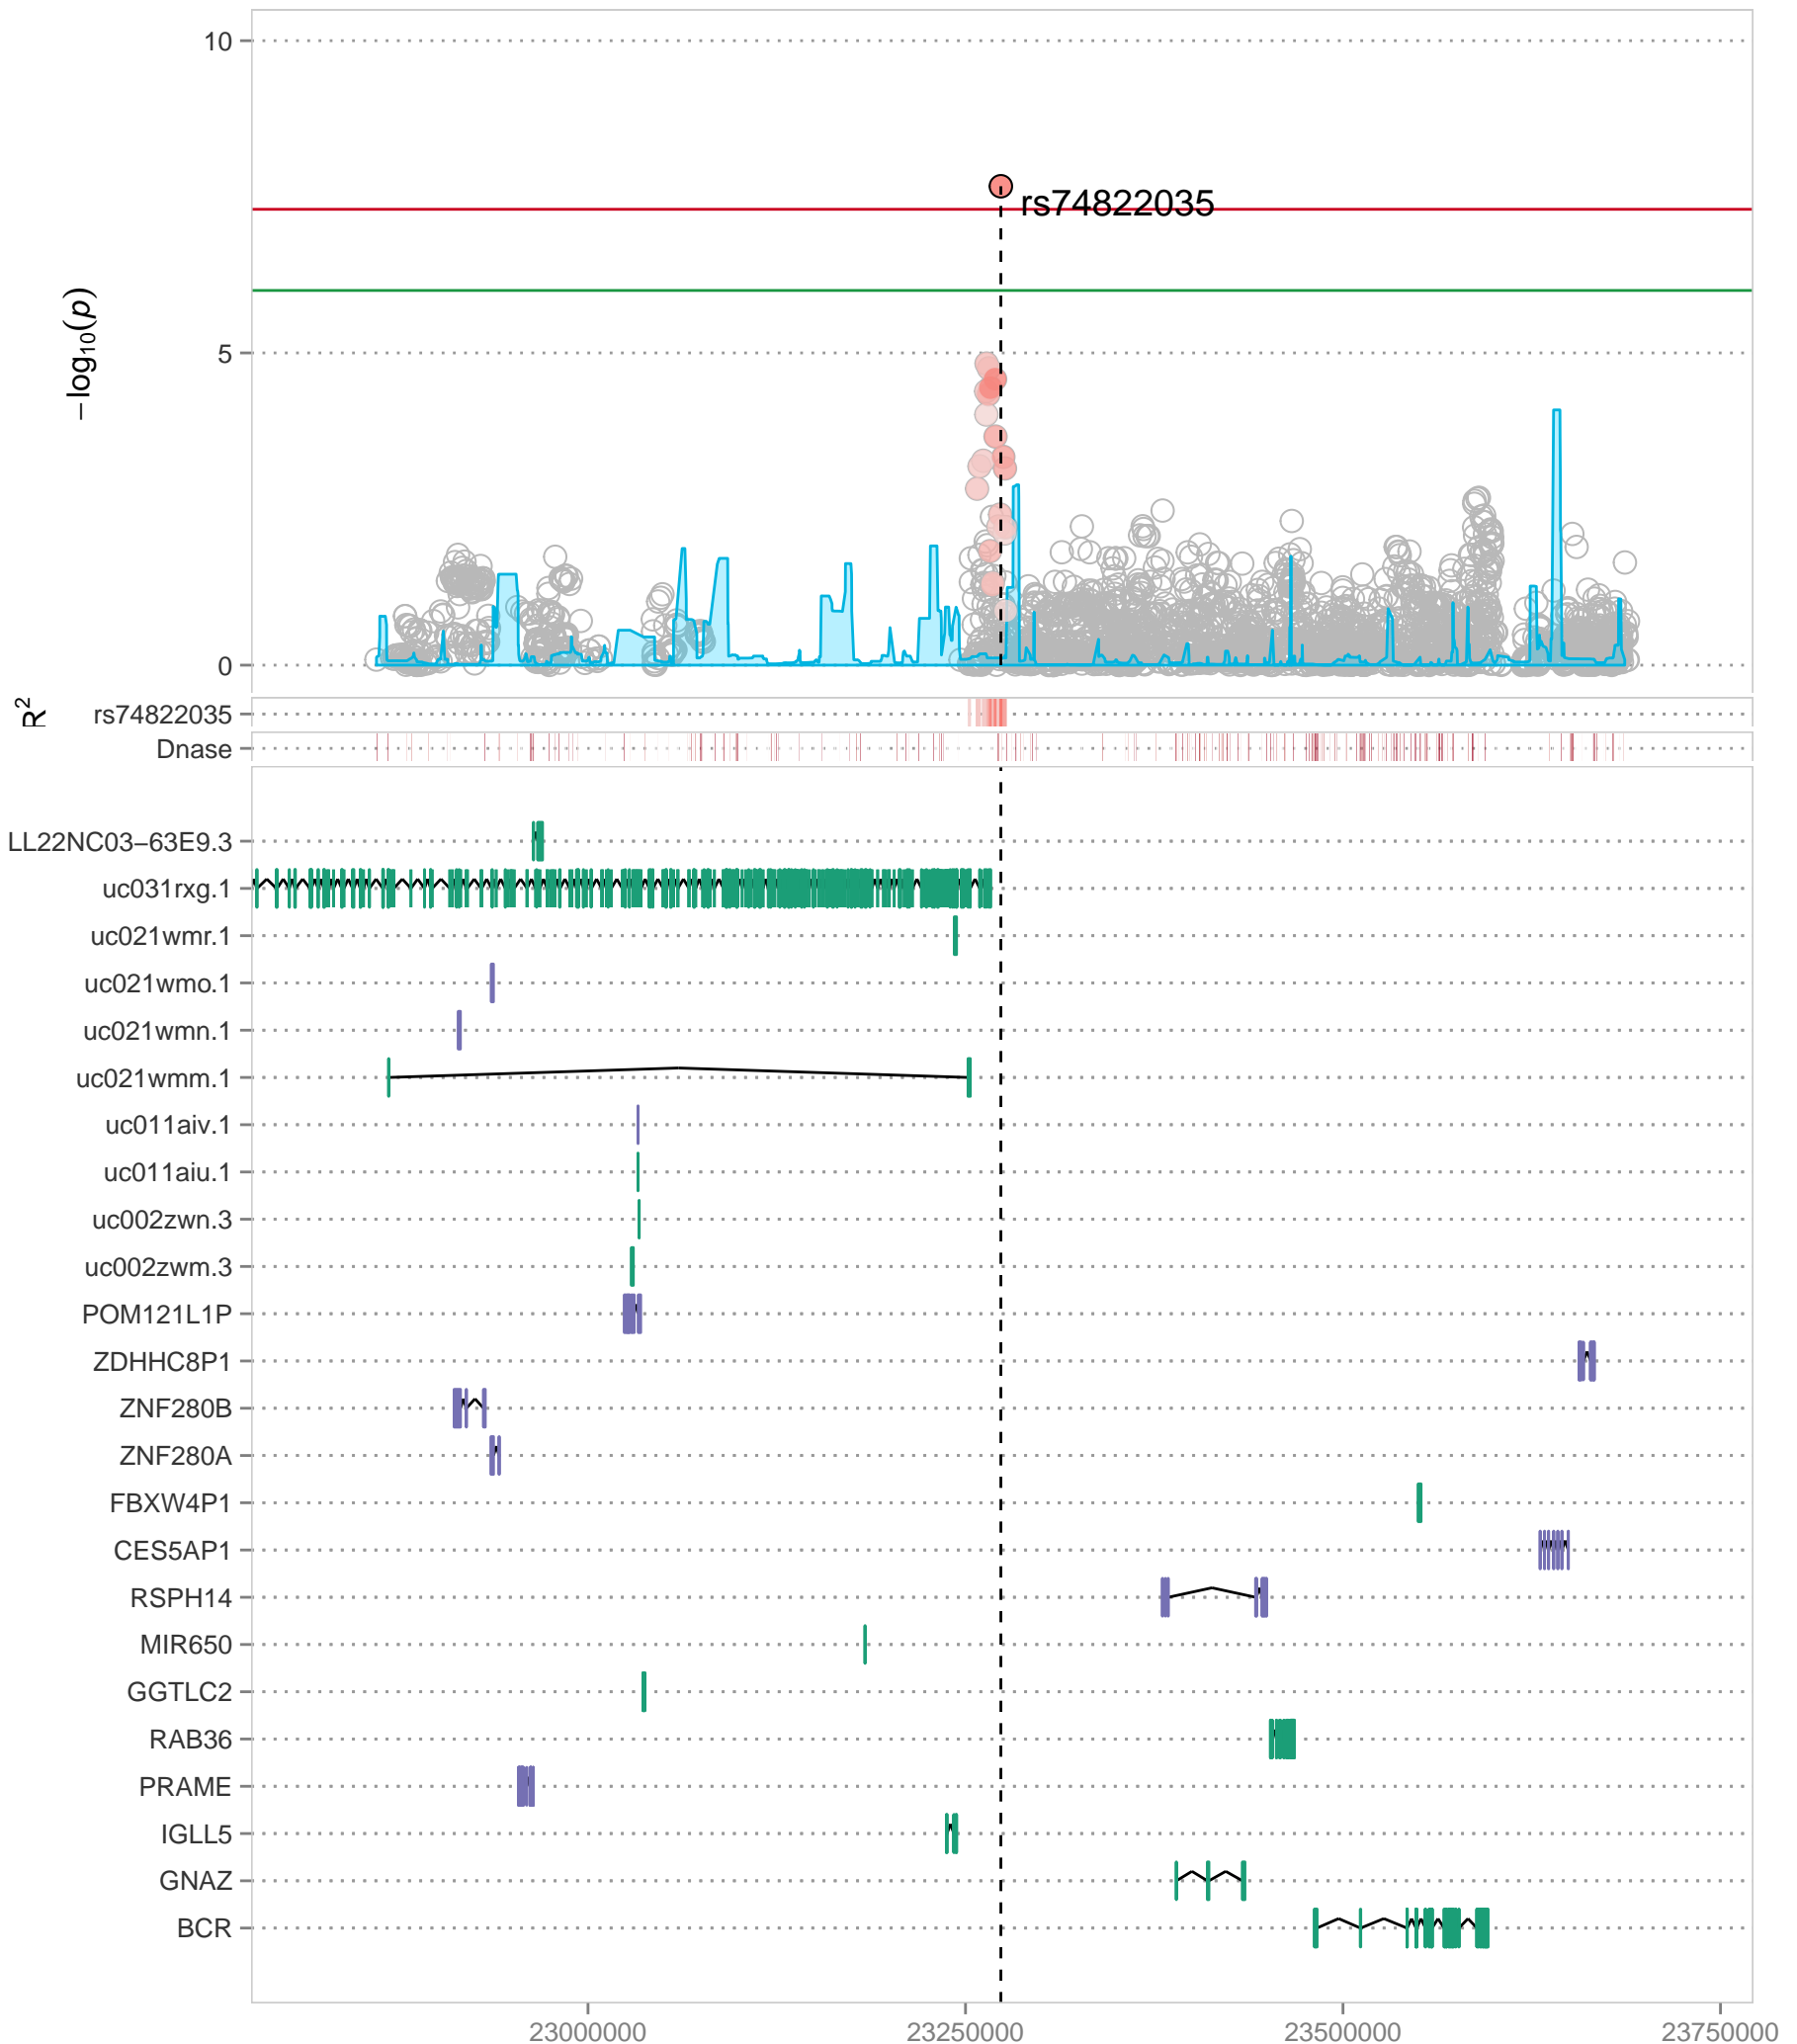

Supplement: pgen.1007739.s018.pdf [file pgen.1007739.s018.pdf]
