# Supplementary material for: Associations of variants In the hexokinase 1 and interleukin 18 receptor regions with oxyhemoglobin saturation during sleep
Source: PubMed Central journal article supplement (PMC6467367; doi:10.1371/journal.pgen.1007739), 2019-04-16

Figure S22 Per90 7q22 rs2711851

chr7

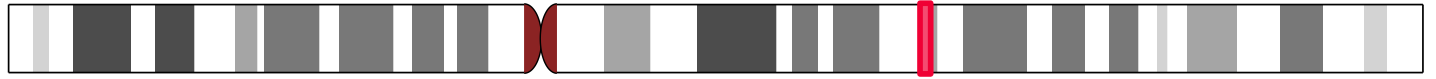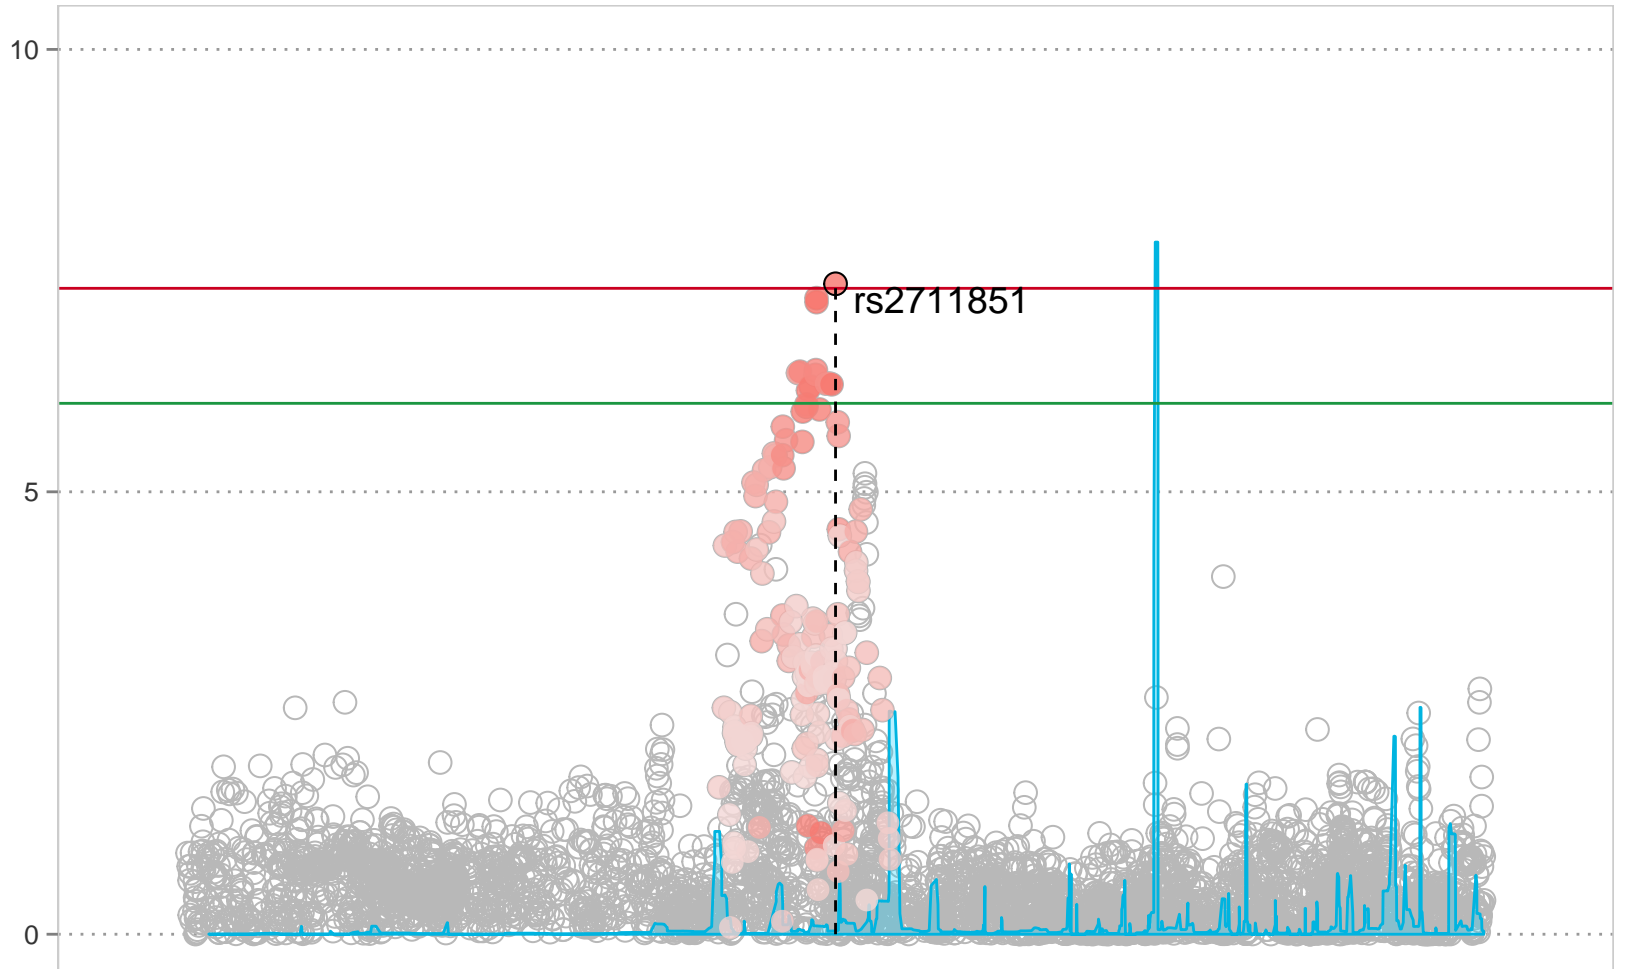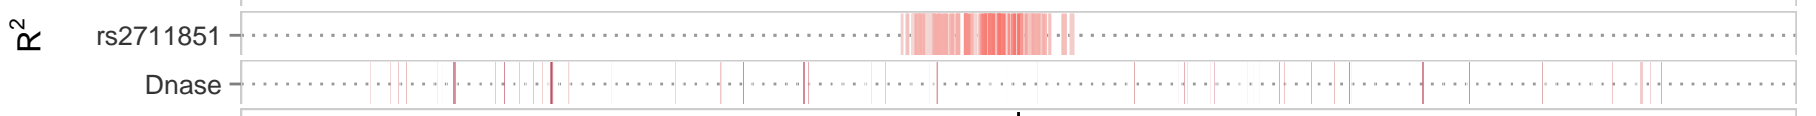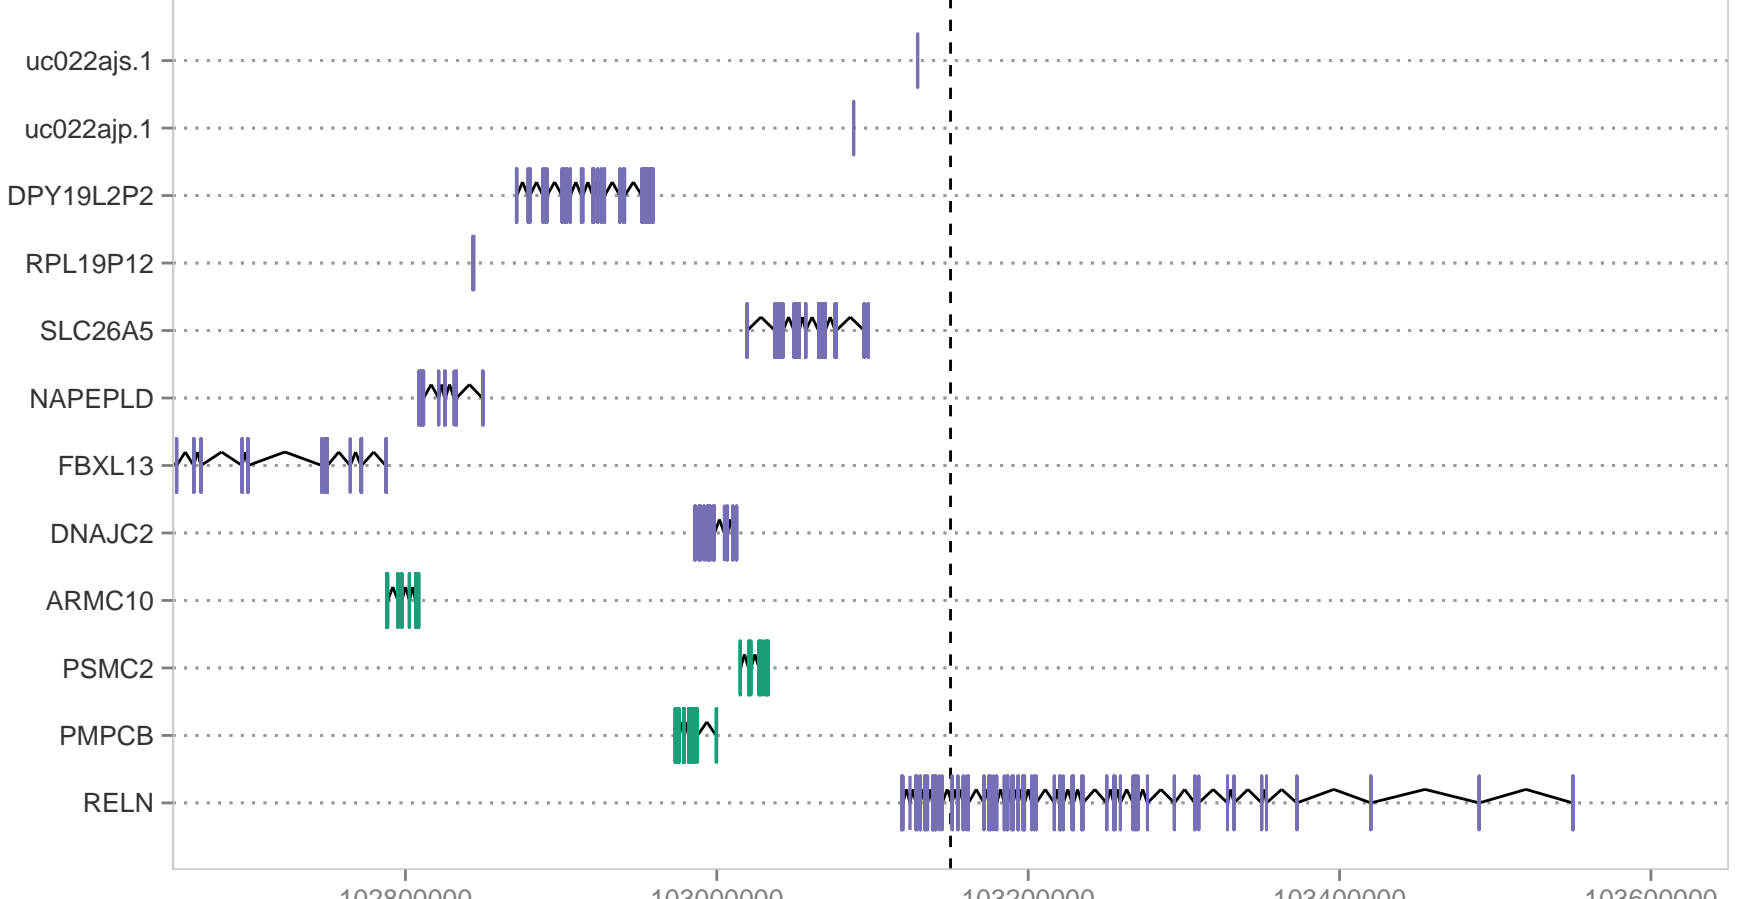

Supplement: pgen.1007739.s022.pdf [file pgen.1007739.s022.pdf]
